# Supplementary material
Source: MDPI journal article supplement (https://www.mdpi.com/2313-0105/9/8/405)
Supplement: s1 [file s1 › batteries-2462102-supplementary.pdf]

# Supporting Information

## **A hollow-shaped ZIF-8-N-doped porous carbon fiber for high-performance Zn-ion hybrid supercapacitors**

Mingqi Wei <sup>1,2</sup>, Zhenlong Jiang <sup>2</sup>, Chengcheng Yang <sup>2</sup>, Tao Jiang <sup>2</sup>, Linlin Zhang <sup>1,2</sup>, Guangzhen Zhao <sup>2,3\*</sup>, Guang Zhu <sup>1,2\*</sup>, Lianghao Yu <sup>2\*</sup>, Yuanyuan Zhu<sup>2</sup>.

<sup>1</sup> School of Mechanics and Optoelectronics Physics, Anhui University of Science and Technology, Huainan 232001, PR China

<sup>2</sup> Key Laboratory of Spin Electron and Nanomaterials of Anhui Higher Education Institutes, Suzhou University, Suzhou 234000, PR China

<sup>3</sup> State Key Laboratory of Biobased Material and Green Papermaking, Qilu University of Technology, Shandong Academy of Sciences, Jinan, 250353

\*Corresponding author: Guangzhen Zhao (zhaogzgold@126.com); Guang Zhu (guangzhu@ahszu.edu.cn).

## 1 Calculation

The gravimetric capacity ( $C_m$ , mA h g<sup>-1</sup>) was calculated from GCD by Eq. S1:

$$C_m = \frac{I\Delta t}{m} \quad \text{Eq. S1}$$

where  $I$ ,  $\Delta t$  and  $m$  are discharge current (A), discharge time (h), mass of active material in the working electrode (g), respectively.

The gravimetric energy density ( $E$ , Wh kg<sup>-1</sup>) and power density ( $P$ , W kg<sup>-1</sup>) of the ZHSCs were calculated with following equations:

$$E = \frac{I \int V dt}{m} \quad \text{Eq. S2}$$

$$P = \frac{E}{t} \quad \text{Eq. S3}$$

The surface capacitive contribution and diffusion-limited battery-type Faradaic contribution could be further quantified according to the following equation:

$$i(V) = k_1 v + k_2 v^{1/2} \quad \text{Eq. S4}$$

Where  $v$  is the scan rate,  $i$  (V) represents the current response at the specific potential,

$k_1 v$  is the surface capacitive contribution;  $k_2 v^{1/2}$  is the diffusion-limited battery-type

Faradaic contribution;  $k_1$ ,  $k_2$  are constant.

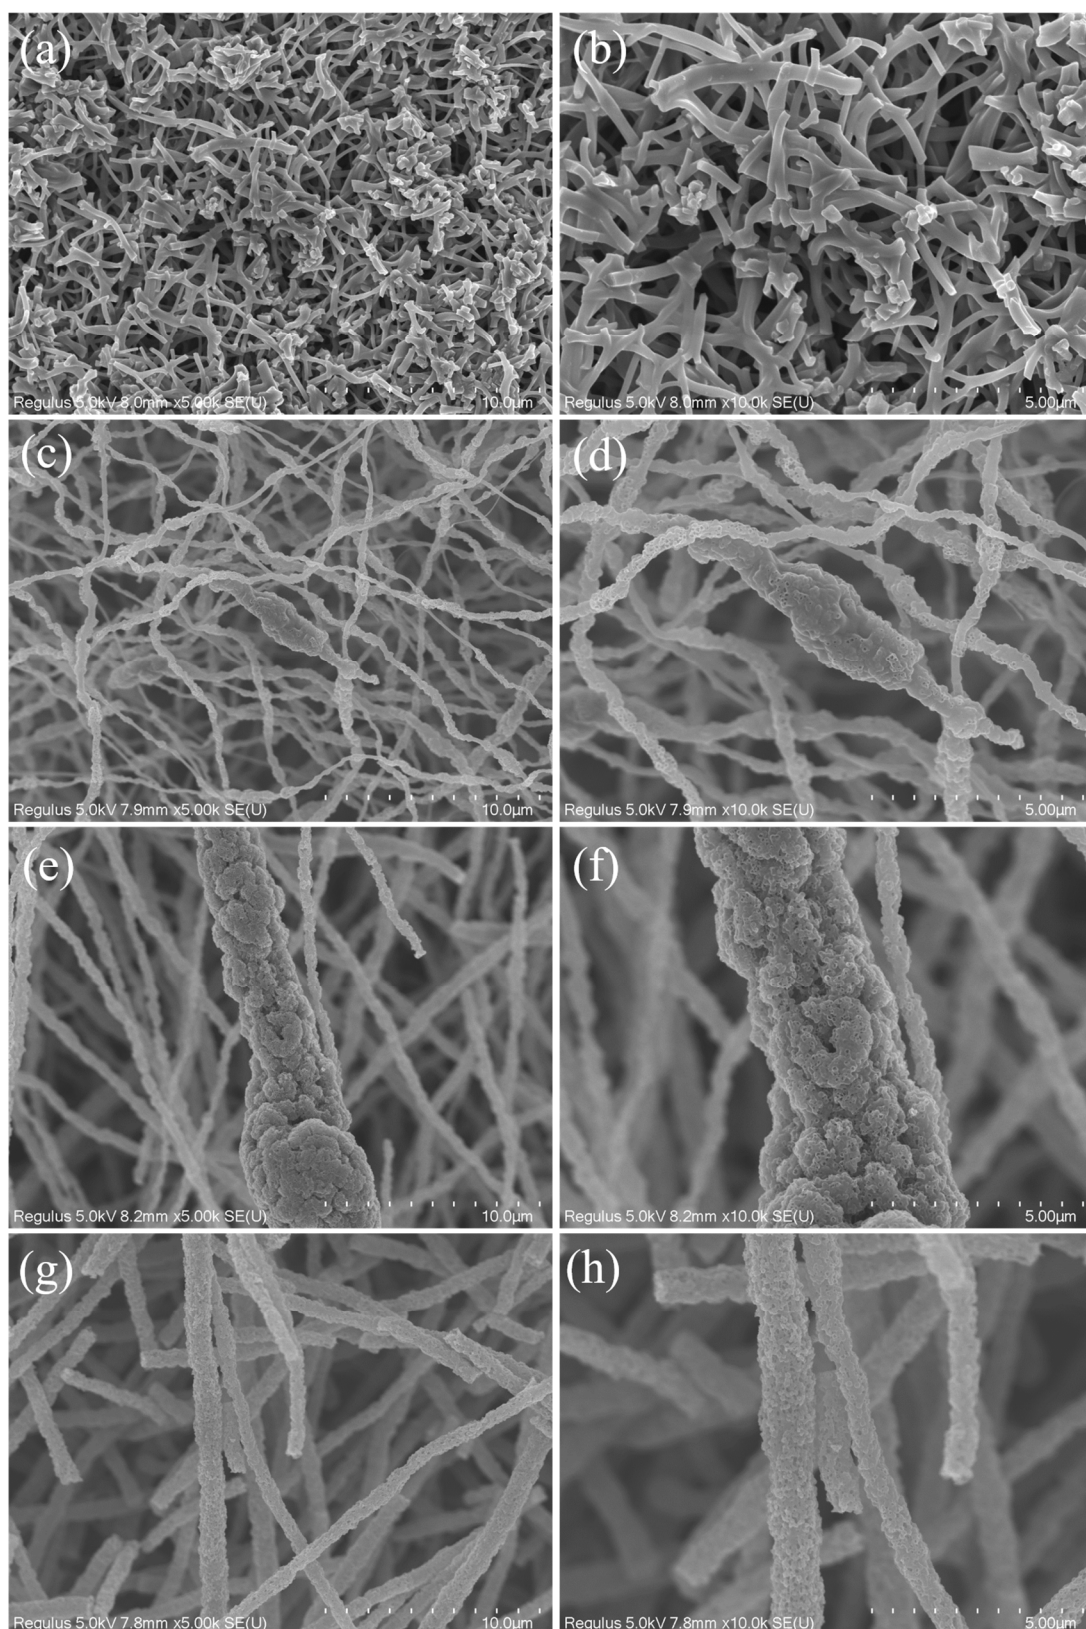

**Figure S1.** SEM images of PCNF (a, b), ZPCNF-0.5 (c, d), ZPCNF-1.0 (e, f) SEM images of ZPCNF-1.5 (g, h).

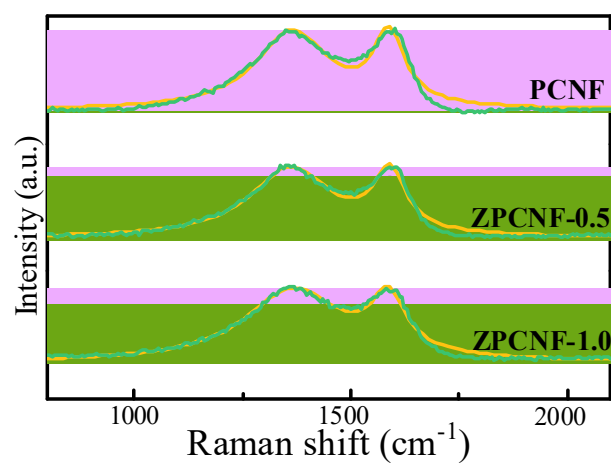

**Figure S2 Raman spectra of the obtained PCNF, ZPCNF-0.5, and ZPCNF-1.0**

| <i>Catalyst</i> | <i>I<sub>D</sub></i> | <i>I<sub>G</sub></i> | <i>I<sub>D</sub>/I<sub>G</sub></i> |
|-----------------|----------------------|----------------------|------------------------------------|
| PCNF            | 131598               | 47428                | 2.78                               |
| ZPCNF-0.5       | 103863               | 36214                | 2.87                               |
| ZPCNF-1.0       | 153792               | 47161                | 3.26                               |
| ZPCNF-1.5       | 99693                | 29466                | 3.38                               |

**Table S1.** The integral areas values of D and G peaks of the obtained samples measured from Raman results

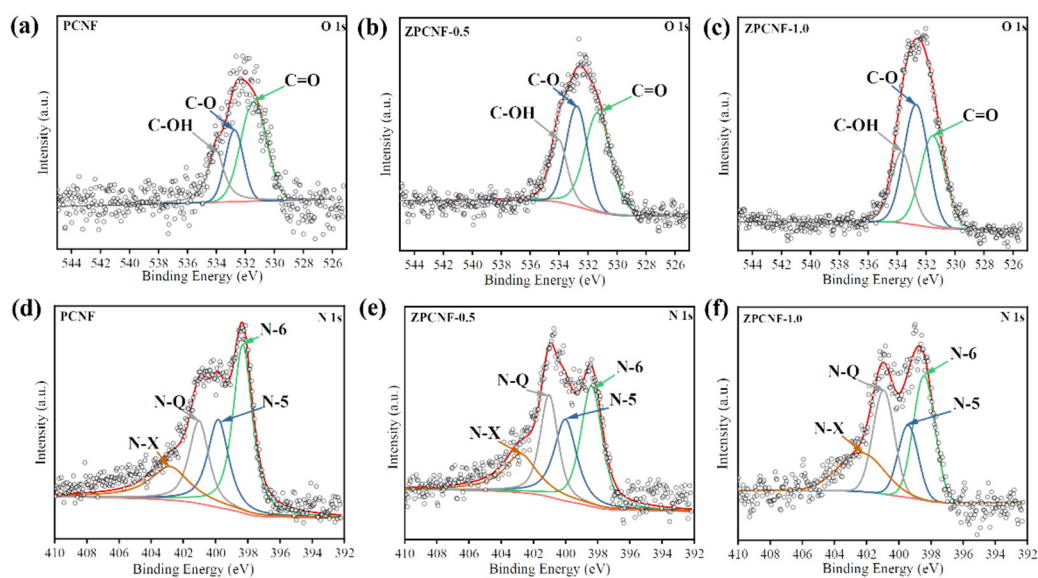

**Figure S3.** High resolution O 1s, N1s spectra of PCNF (a, d), ZPCNF-0.5 (b, e), ZPCNF-1.0 (c, f).

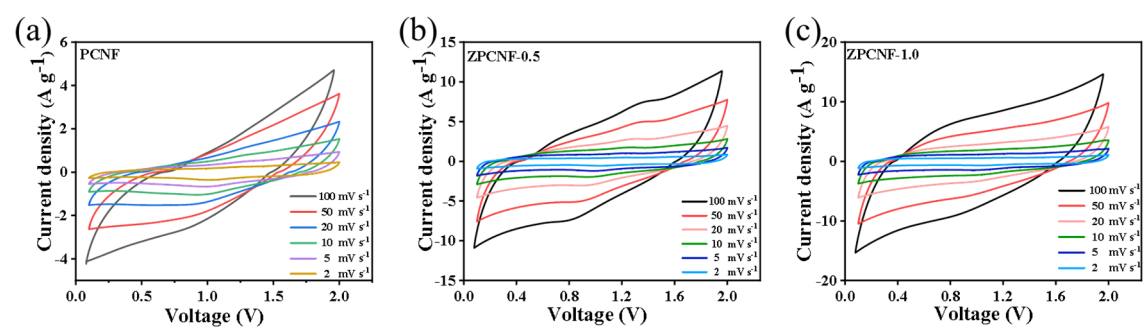

**Figure S4.** The CV curves of PCNF (a), ZPCNF-0.5 (b), ZPCNF-1.0 (c).

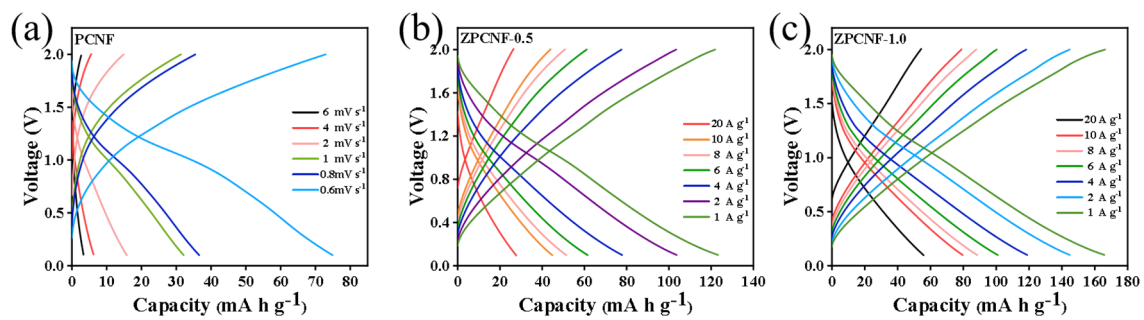

**Figure S5.** The GCD curves of PCNF (a), ZPCNF-0.5 (b), ZPCNF-1.0 (c).

| <i>Sample</i> | <i>Specific<br/>surface area<br/>(m<sup>2</sup> g<sup>-1</sup>)</i> | <i>Pore<br/>Volume<br/>(cm<sup>3</sup> g<sup>-1</sup>)</i> | <i>C/ %</i> | <i>N/ %</i> | <i>O/ %</i> |
|---------------|---------------------------------------------------------------------|------------------------------------------------------------|-------------|-------------|-------------|
| PCNF          | 2.9                                                                 | 0.0029                                                     | 91.04       | 4.51        | 4.45        |
| ZPCNF-0.5     | 268.4                                                               | 0.27                                                       | 86.23       | 8.5         | 5.27        |
| ZPCNF-1.0     | 301.9                                                               | 0.29                                                       | 82.8        | 10.13       | 7.07        |
| ZPCNF-1.5     | 418.3                                                               | 0.33                                                       | 79.15       | 12.78       | 8.07        |

**Table S2.** Porosity parameters and Elements analysis of PCNF, ZPCNF-0.5, ZPCNF-1.0 and ZPCNF-1.5.

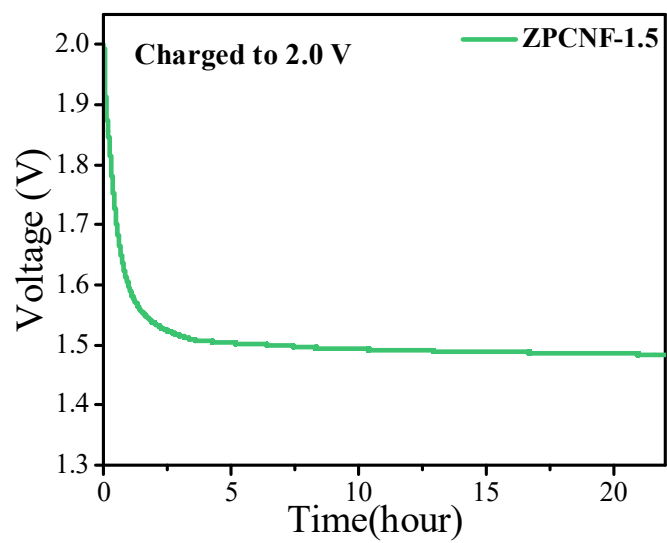

**Figure S6.** Self-discharge curves of Zn//ZPCNF-1.5 ZHSCs within the potential windows of 0.1–2.0 V.
